# Supplementary material for: Design of a potassiophilic 3D conductive scaffold potassium anode (3D-CTZ@K) with dendrite-free and high energy-power density in potassium metal batteries
Source: Royal Society of Chemistry journal article supplement (doi:10.1039/d3ta03427e), 2023-01-01
Supplement: d3ta03427e4.pdf [file d3ta03427e4.pdf]

## Supplementary Information

### Design of Potassiophilic 3D Conductive Scaffold Potassium Anode (3D-CTZ@K ) with Dendrite-Free and High Energy-Power Density in Potassium Metal Batteries

Dong-Ting Zhang<sup>a, b</sup>, Mao-Cheng Liu<sup>a, b \*</sup>, Min-Peng Li<sup>a, b</sup>, Hao Chen<sup>a, b</sup>, Chen-Yang Li<sup>a, b</sup>, Yu-Xia Hu<sup>a, b</sup>, Ling-Bin Kong<sup>a, b</sup>, Xiang-Yun Zhang<sup>a, b</sup>, Bing-Ni Gu<sup>c, d, e, f</sup>, Ming-Jin Liu<sup>c, d, e, f</sup>, Kun Zhao<sup>a, b</sup>, Jun-Qiang Ren<sup>a, b</sup>, Zi-Zhou Yuan<sup>a, b \*</sup>, Yu-Lun Chueh<sup>c, d, e, f \*</sup>

<sup>a</sup>State Key Laboratory of Advanced Processing and Recycling of Non-ferrous Metals, Lanzhou University of Technology, Lanzhou 730050, People's Republic of China

<sup>b</sup>School of Materials Science and Engineering, Lanzhou University of Technology, Lanzhou 730050, People's Republic of China

<sup>c</sup>Department of Materials Science and Engineering, National Tsing Hua University, Hsinchu, 30013, Taiwan.

<sup>d</sup>College of Semiconductor Research, National Tsing-Hua University, Hsinchu, 30013, Taiwan.

<sup>e</sup>Frontier Research Center on Fundamental and Applied Sciences of Materials, National Tsing Hua University, Hsinchu, 30013, Taiwan.

<sup>f</sup>Department of Physics, National Sun Yat-Sen University, Kaohsiung, 80424, Taiwan.

\* E-mail: liumc@lut.edu.cn, yuanzz@lut.edu.cn, and ylchueh@mx.nthu.edu.tw

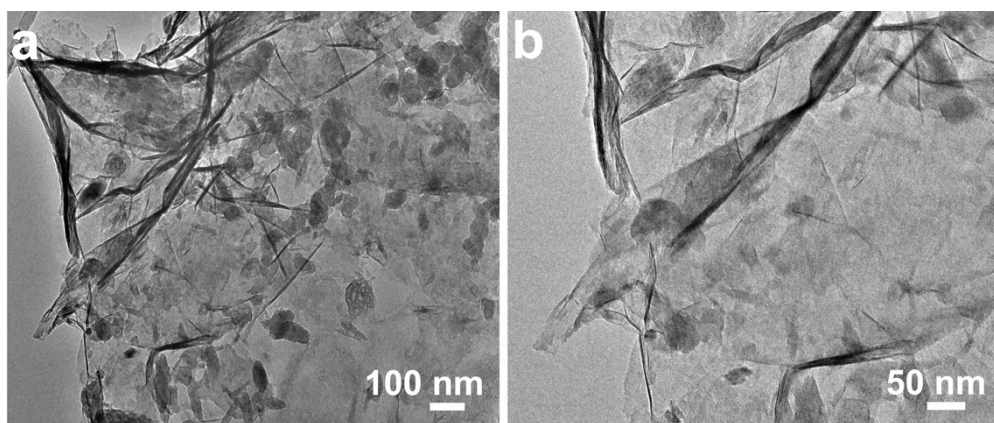

**Figure S1** a, b) TEM images of TZ hybrids.

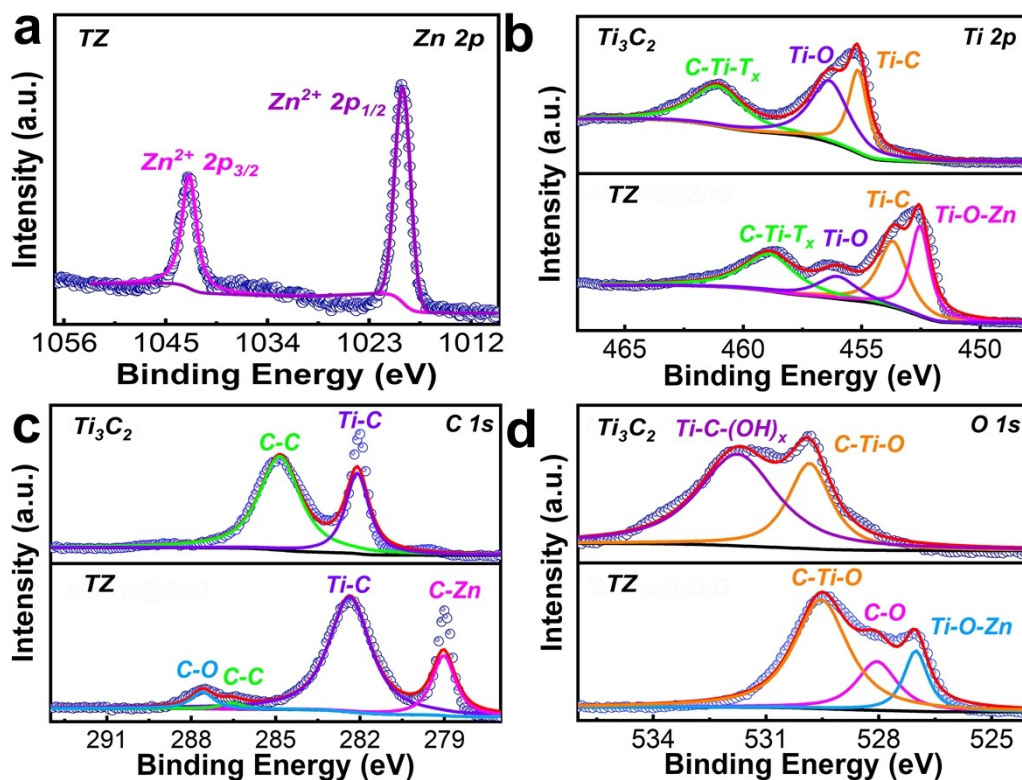

**Figure S2** a) The high-resolution XPS spectra of Zn 2p in TZ hybrids. High-resolution XPS spectra of  $\text{Ti}_3\text{C}_2$  and TZ hybrids, showing the fitting curves at b) Ti 2p, c) C 1s, and d) O 1s peaks, respectively.

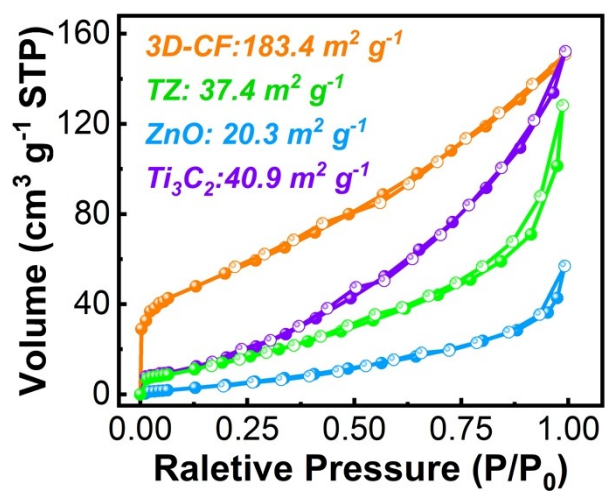

**Figure S3** N<sub>2</sub> adsorption-desorption isotherm of 3D-CF, TZ, ZnO, and Ti<sub>3</sub>C<sub>2</sub>.

The SSA of 3D-CF, TZ, ZnO, and Ti<sub>3</sub>C<sub>2</sub> are 183.4, 37.4, 20.3, and 40.9 m<sup>2</sup> g<sup>-1</sup>, respectively.

Compared with 3D-CF, the decreased SSA of 3D-CTZ is ascribed to the adhered of TZ hybrids, which take up some of the empty space in the 3D-CF.

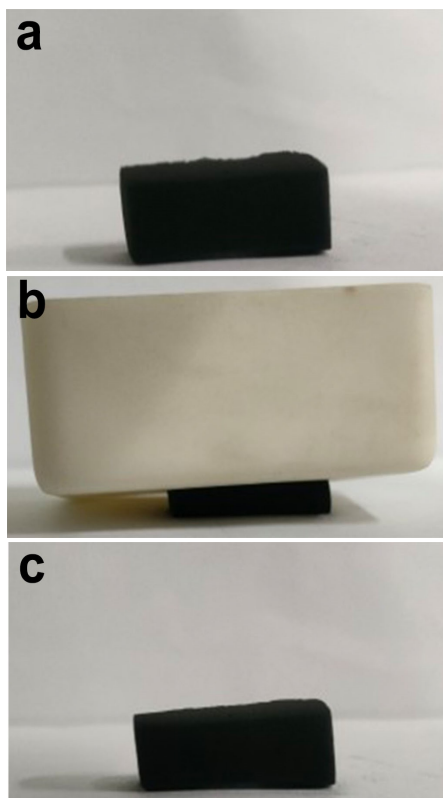

**Figure S4** The macroscopic digital photo of 3D-CTZ scaffold (a) without the stress, (b) under the compressive stress, and (c) after removing the compressive stress.

It can be observed in the macroscopic digital photos that the 3D-CTZ scaffold undergoes deformation under pressure, and then recovers deformation and maintains the same after removing the compressive stress. The result proved that 3D-CTZ scaffold possesses the outstanding mechanical property, which is favorable to support the infusion of the molten K metal and buffer huge stress-strain during the K plating/stripping processes.

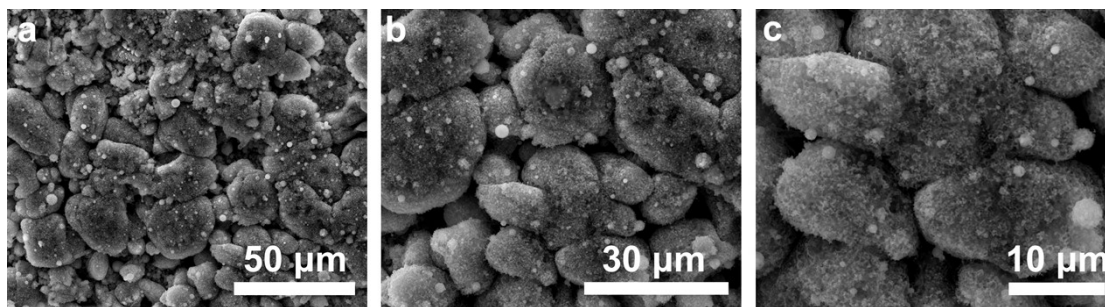

**Figure S5** (a-c) Top-view SEM images of 3D-CTZ@K after 200 th cycles at the current density of  $0.5 \text{ mA cm}^{-2}$  and the cycling capacity of  $0.5 \text{ mAh cm}^{-2}$ .

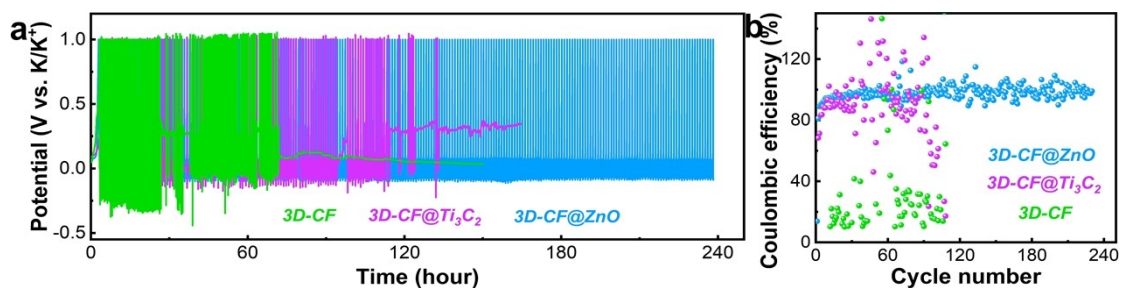

**Figure S6** Electrochemical performance of K//3D-CF, K//3D-CF@Ti<sub>3</sub>C<sub>2</sub>, and K//3D-CF@ZnO half batteries. (a) Galvanostatic plating and stripping profiles for half-batteries at the current density of  $1.0 \text{ mA cm}^{-2}$ . (b) Coulombic efficiency.

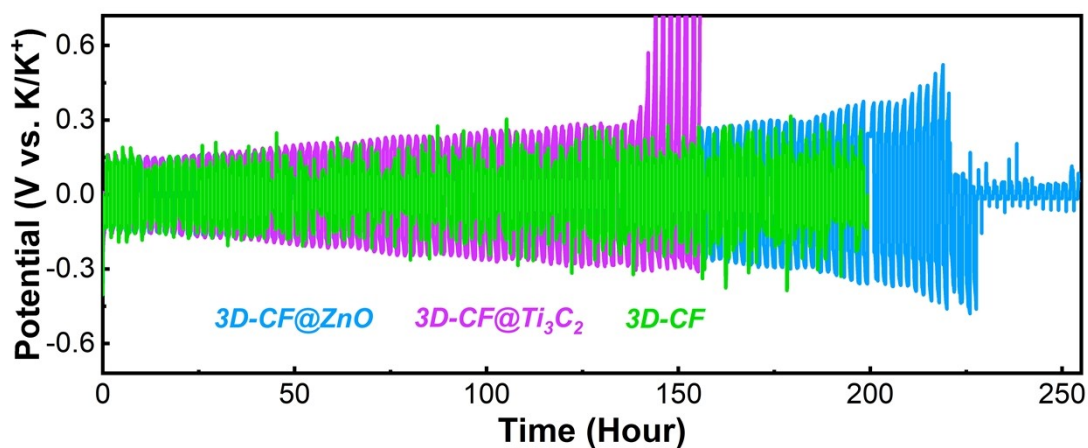

**Figure S7** Galvanostatic cycle of 3D-CF@ZnO@K//3D-CF@ZnO@K, 3D-CF@Ti<sub>3</sub>C<sub>2</sub>@K//3D-CF@Ti<sub>3</sub>C<sub>2</sub>@K, and 3D-CF@K//3D-CF@K symmetrical batteries at the current density of 0.5 mA cm<sup>-2</sup> with the capacity of 0.5 mAh cm<sup>-2</sup> per cycle.

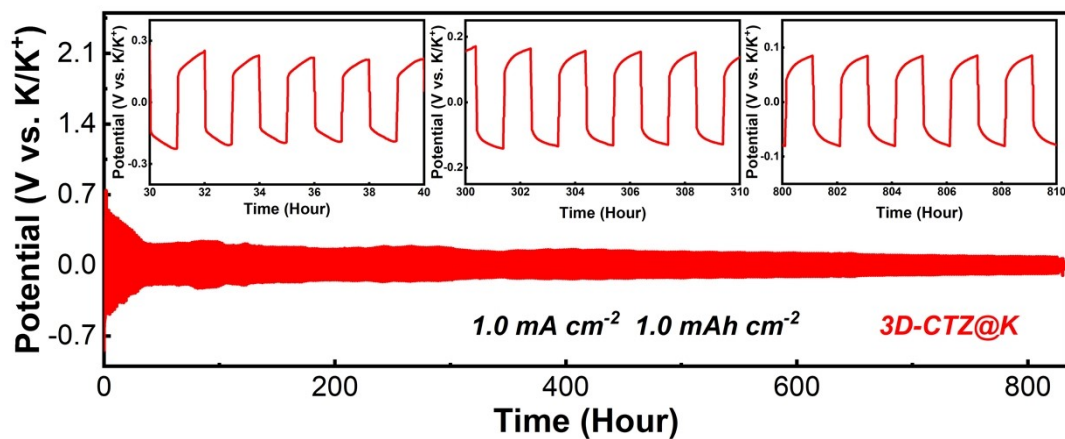

**Figure S8.** Galvanostatic cycles of 3D-CTZ@K//3D-CTZ@K batteries. The current density was fixed at 1.0 mA cm<sup>-2</sup> with the capacity of 1.0 mAh cm<sup>-2</sup> per cycle.

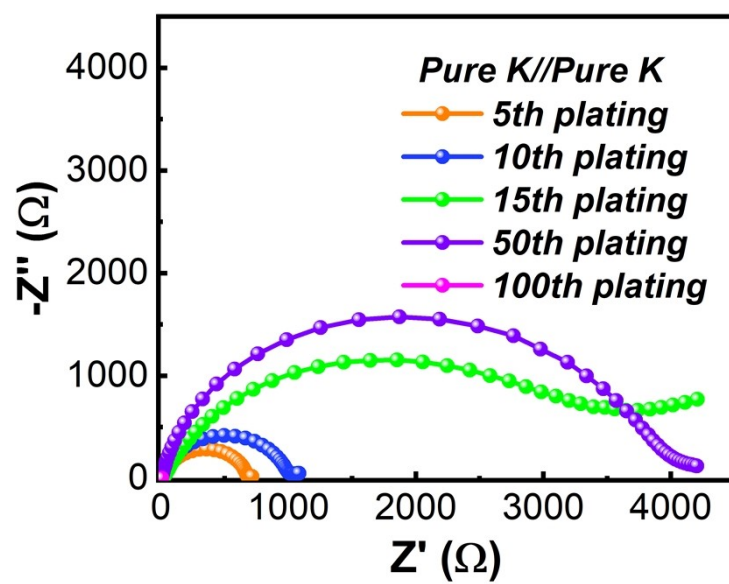

**Figure S9.** Nyquist plots of K//K battery after different cycles at  $1.0 \text{ mA cm}^{-2}$  to  $1.0 \text{ mAh cm}^{-2}$  per cycle.
